# Supplementary material for: Free shrimp cocktail for everyone! Trophic relationships of 13 elasmobranchs in Central Patagonia, Southwestern Atlantic
Source: Research Square preprint supplement (doi:10.21203/rs.3.rs-3626126/v1), 2023-11-21

**Free shrimp cocktail for everyone! Trophic relationships of 13 elasmobranchs in Central Patagonia, Southwestern Atlantic.**

Aquatic Sciences

Alessandra Tatiana Pasti\*, Nelson Darío Bovcon, Martha Patricia Rincón-Díaz, David Edgardo Galván

\*Corresponding author. E-mail address: alepas\_19@hotmail.com

**Supplementary material**

**ESM 1** Trophic level of the prey categories obtained from Ebert and Bizarro (2007) used to calculate the trophic position of the elasmobranchs analyzed in the present study

| Group code | Description                                                | Trophic level |
|------------|------------------------------------------------------------|---------------|
| INVERT     | Other invertebrates and unidentified invertebrates         | 2.5           |
| POLY       | Polychaetes and other marine worms                         | 2.6           |
| MOLL       | Molluscs (excluding cephalopods) and unidentified mollusks | 2.1           |
| SQUID      | Squids                                                     | 3.2           |
| CEPH       | Octopi, cuttlefishes and unidentified cephalopods          | 3.2           |
| AMPH       | Amphipods and isopods                                      | 3.18          |
| DECA       | Decapod crustaceans                                        | 2.52          |
| OCRUST     | Other crustaceans and unidentified crustaceans             | 2.4           |
| CHOND      | Chondrichthyan fishes                                      | 3.65          |
| FISH       | Teleost and agnathan fishes                                | 3.24          |

Ebert, D.A. & J.J. Bizarro, 2007. Standardized diet compositions and trophic levels of skates (Chondrichthyes: Rajiformes: Rajoidei). In *Biology of Skates*, 115-131 pp. Springer, Dordrecht.

**ESM 2** Major prey groups and most consumed species reported in previous studies for Argentina on the diet of the 13 elasmobranch species included in this study

| Species                                               | Author/s                      | Region                                            | Major prey groups                                                                                                                                                   |
|-------------------------------------------------------|-------------------------------|---------------------------------------------------|---------------------------------------------------------------------------------------------------------------------------------------------------------------------|
| <b>Gatuzo</b><br><i>(Mustelus schmitti)</i>           | Our study                     | Central Patagonia (41°–47°S)                      | %FO: Decapod crustaceans Dendrobranchiata ( <i>Pleoticus muelleri</i> ) and Brachyura ( <i>Peltarion spinosulum</i> ) and polychaetes (family Eunicidae)            |
|                                                       | Belleggia et al., 2011        | Argentine continental shelf (34°45'S-41°S)        | %FO: Decapod crustaceans Brachyura ( <i>Loxopagurus loxochelis</i> , <i>Peltarion spinosulum</i> ), polychaetes (Maldanidae) and fish ( <i>Engraulis anchoita</i> ) |
|                                                       | Belleggia, 2012               | Northern Argentine continental shelf (36°-39.3°S) | %FO: Polychaetes (Maldanidae), decapod crustaceans Brachyura ( <i>Peltarion spinosulum</i> ) and fish ( <i>Engraulis anchoita</i> )                                 |
|                                                       | Belleggia et al., 2019        | Northern Argentine continental shelf              | %FO: Decapod crustaceans Brachyura ( <i>Peltarion spinosulum</i> ), polychaetes and fish ( <i>Raneya brasiliensis</i> )                                             |
|                                                       | Chiaramonte & Petovello, 2000 | Ría Deseado and Mar del Plata (47°45'S- 65°55'W)  | %FO: Decapod crustaceans Brachyura ( <i>Cyrtograpsus angulatus</i> ) and fishes ( <i>Austroatherina incisa</i> and <i>Sprattus fuegensis</i> )                      |
|                                                       | Menni et al., 1986            | Buenos Aires province                             | %FO: Crustaceans, polychaetes and fishes                                                                                                                            |
|                                                       | Molina & Cazorla, 2011        | Bahía Anegada (39.96°-40.60°S)                    | %FO: Decapod crustaceans Brachyura ( <i>Neohelice granulata</i> ) and polychaetes                                                                                   |
|                                                       | Molina, 2012                  | Bahía Anegada                                     | %FO: Decapod crustaceans Brachyura ( <i>Neohelice granulata</i> ) and polychaetes                                                                                   |
|                                                       | Oliver et al., 1968           | Mar del Plata (38°20'S)                           | %FO: Decapod crustaceans Dendrobranchiata ( <i>Artemesia longinaris</i> ) and Brachyura ( <i>Corystoides chilensis</i> ) and polychaetes                            |
|                                                       | Sánchez & Prenski, 1996       | San Jorge gulf (45°-47°S)                         | %W: Decapod crustaceans Brachyura (family Majidae) and polychaetes                                                                                                  |
|                                                       | Van der Molen & Caille, 2001  | Bahía Engaño (43°04'-43°24'S)                     | %FO: Decapod crustaceans Dendrobranchiata ( <i>Artemesia longinaris</i> ) and polychaetes                                                                           |
| <b>Tiburón espinoso</b><br><i>(Squalus acanthias)</i> | Our study                     | Central Patagonia (41°–47°S)                      | %FO: Fish ( <i>Merluccius hubbsi</i> ) and decapod crustaceans Dendrobranchiata ( <i>Pleoticus muelleri</i> )                                                       |
|                                                       | Barone, 2006                  |                                                   |                                                                                                                                                                     |

|                                                            |                                   |                                                          |                                                                                                                                                                                                                                      |
|------------------------------------------------------------|-----------------------------------|----------------------------------------------------------|--------------------------------------------------------------------------------------------------------------------------------------------------------------------------------------------------------------------------------------|
|                                                            |                                   | North and Central Argentine Patagonian Sea (40°S - 46°S) | %IRI: Cephalopods ( <i>Illex argentinus</i> ) and fish ( <i>Merluccius hubbsi</i> )                                                                                                                                                  |
|                                                            | Belleggia et al., 2012            | Argentine continental shelf (35°-55°S)                   | %FO: Cephalopods ( <i>Illex argentinus</i> ) and fish ( <i>Merluccius hubbsi</i> )                                                                                                                                                   |
|                                                            | Belleggia et al., 2019            | Northern Argentine continental shelf                     | %FO: Fish ( <i>Engraulis anchoita</i> )                                                                                                                                                                                              |
|                                                            | García de la Rosa & Sánchez, 1997 | Argentine Sea (34°-47° S)                                | %FO: Ctenophores ( <i>Pleurobrachia pileus</i> ), fish ( <i>Merluccius hubbsi</i> ) and cephalopods ( <i>Illex argentinus</i> )                                                                                                      |
|                                                            | García de la Rosa, 1998           | Argentine continental shelf (34°-55° S)                  | %FO: Fish ( <i>Merluccius hubbsi</i> ), cephalopods ( <i>Illex argentinus</i> ) and ctenophores ( <i>Pleurobrachia pileus</i> )                                                                                                      |
|                                                            | Koen Alonso, 1999                 | Northern and central Patagonia (41°-47°S)                | %FO: Cephalopods ( <i>Illex argentinus</i> ) and fish ( <i>Merluccius hubbsi</i> )                                                                                                                                                   |
|                                                            | Koen Alonso et al., 2002          | Northern and central Patagonia                           | %W: Cephalopods ( <i>Illex argentinus</i> ), fish ( <i>Merluccius hubbsi</i> ) and ctenophores ( <i>Pleurobrachia pileus</i> )                                                                                                       |
|                                                            | Menni, 1985                       | Argentine Sea                                            | Fishes                                                                                                                                                                                                                               |
|                                                            | Sánchez & Prenski, 1996           | San Jorge gulf                                           | %W: Fish ( <i>Merluccius hubbsi</i> ), cephalopods ( <i>Illex argentinus</i> ) and ctenophores                                                                                                                                       |
| <b>Tiburón pintarroja (<i>Schroederichthys bivius</i>)</b> | Our study                         | Central Patagonia (41°–47°S)                             | %FO: Decapod crustaceans Dendrobranchiata ( <i>Pleoticus muelleri</i> ), fish ( <i>Merluccius hubbsi</i> ) and polychaetes                                                                                                           |
|                                                            | Belleggia et al., 2019            | Northern Argentine continental shelf                     | %FO: Polychaetes ( <i>Aphroditella</i> spp.)                                                                                                                                                                                         |
|                                                            | Matallanas et al., 1993           | Beagle Channel (54°53'S, 67°-68°W)                       | %IRI: Decapod crustaceans Anomura ( <i>Munida subrugosa</i> )                                                                                                                                                                        |
|                                                            | Menni et al., 1979                | Argentine continental shelf                              | Fishes, polychaetes and crustaceans                                                                                                                                                                                                  |
|                                                            | Sánchez & Prenski, 1996           | San Jorge gulf                                           | %W: In summer: cephalopods, decapod crustaceans Anomura ( <i>Munida</i> ) and polychaetes. The rest of the year: stomatopods and polychaetes                                                                                         |
|                                                            | Sánchez et al., 2009              | Southwest Atlantic Ocean (34°-54°S)                      | %W: SJG: stomatopods ( <i>Pterigosquilla armata armata</i> ), decapod crustaceans Brachyura (family Majidae and <i>Peltarion spinosulum</i> ), Dendrobranchiata ( <i>Pleoticus muelleri</i> ) and Anomura ( <i>Munida gregaria</i> ) |
| <b>Squatina (<i>Squatina guggenheim</i>)</b>               | Our study                         | Central Patagonia (41°–47°S)                             | %FO: Fishes ( <i>Merluccius hubbsi</i> and <i>Raneya brasiliensis</i> ) and cephalopods ( <i>Illex argentinus</i> )                                                                                                                  |

|                                            |                               |                                                           |                                                                                                                                                                                                                                                                                                                                 |
|--------------------------------------------|-------------------------------|-----------------------------------------------------------|---------------------------------------------------------------------------------------------------------------------------------------------------------------------------------------------------------------------------------------------------------------------------------------------------------------------------------|
|                                            | Belleggia et al., 2019        | Northern Argentine continental shelf                      | %FO: Fish ( <i>Engraulis anchoita</i> )                                                                                                                                                                                                                                                                                         |
|                                            | Colonello, 2005               | Bonaerense Biogeographic District (34°-42°S)              | %IRI: Fish ( <i>Cynoscion guatucupa</i> )                                                                                                                                                                                                                                                                                       |
|                                            | Milessi et al., 2019          | Río de La Plata (36°24'-36°54'S)                          | %W: Decapod crustaceans Dendrobranchiata ( <i>Peisos petrunkevitchi</i> and <i>Artemesia longinaris</i> )                                                                                                                                                                                                                       |
|                                            | Oyarsún González et al., 2003 | Uruguay and northern Argentina                            | Fish ( <i>Engraulis anchoita</i> )                                                                                                                                                                                                                                                                                              |
|                                            | Vögler et al., 2003           | Argentine-Uruguayan Common Fishing Zone (34°00'-39°30' S) | %N: Fish ( <i>Engraulis anchoita</i> )                                                                                                                                                                                                                                                                                          |
|                                            | Vögler et al., 2009           | Argentine-Uruguayan Common Fishing Zone                   | %IRI: 23-60 cm TL: Fishes ( <i>Engraulis anchoita</i> and <i>Patagonotothen longipes</i> )/61-80 cm TL: Decapod crustaceans Dendrobranchiata (Penaeidae) and fishes ( <i>Cynoscion guatucupa</i> and <i>Merluccius hubbsi</i> )/81-91 cm TL: Fish ( <i>Patagonotothen ramsayi</i> ) and cephalopods ( <i>Illex argentinus</i> ) |
| <b>Cazón (<i>Galeorhinus galeus</i>)</b>   | Our study                     | Central Patagonia (41°–47°S)                              | %FO: Fish ( <i>Merluccius hubbsi</i> ), cephalopods ( <i>Illex argentinus</i> and <i>Octopus tehuelchus</i> ) and decapod crustaceans Dendrobranchiata ( <i>Pleoticus muelleri</i> )                                                                                                                                            |
|                                            | Elías et al., 2004            | Northern Patagonian gulfs (42°-43°S)                      | Fishes ( <i>Merluccius hubbsi</i> , <i>Genypterus blacodes</i> , <i>Raneya brasiliensis</i> , <i>Odontesthes sp.</i> ) and cephalopods ( <i>Illex argentinus</i> )                                                                                                                                                              |
|                                            | Koen Alonso, 1999             | Northern and central Patagonia (41°-47°S)                 | %IRI: Fish ( <i>Merluccius hubbsi</i> ) and cephalopods ( <i>Illex argentinus</i> and <i>Enteroctopus megalocyathus</i> )                                                                                                                                                                                                       |
|                                            | Lucifora, 2003                | Bahía Anegada (39.96°-40.60°S)                            | %IRI: Fishes ( <i>Raneya brasiliensis</i> , <i>Cynoscion guatucupa</i> and <i>Porichthys porosissimus</i> )                                                                                                                                                                                                                     |
|                                            | Lucifora et al., 2006         | Bahía Anegada                                             | %FO: Fishes ( <i>Raneya brasiliensis</i> , <i>Cynoscion guatucupa</i> and <i>Porichthys porosissimus</i> )                                                                                                                                                                                                                      |
|                                            | Menni, 1985                   | Argentine Sea                                             | Fishes ( <i>Dules auriga</i> and <i>Engraulis anchoita</i> )                                                                                                                                                                                                                                                                    |
| <b>Torpedo (<i>Discopyge tschudii</i>)</b> | Our study                     | Central Patagonia (41°–47°S)                              | %FO: Polychaetes (Family Eunicidae)                                                                                                                                                                                                                                                                                             |
|                                            | Arrighetti et al., 2005       | Mar del Plata                                             | %W: Clam siphons ( <i>Amiantis purpurata</i> ) and polychaetes                                                                                                                                                                                                                                                                  |

|                                                |                           |                                                         |                                                                                                                                 |
|------------------------------------------------|---------------------------|---------------------------------------------------------|---------------------------------------------------------------------------------------------------------------------------------|
|                                                | García, 1984              | Mar del Plata                                           | %FO: Polychaetes and amphipods (gamarids)                                                                                       |
|                                                | Menni & Stehmann, 2000    | Argentina, Uruguay and Brazil                           | Polychaetes and amphipods (gamarids)                                                                                            |
|                                                | Sánchez & Prenski, 1996   | San Jorge gulf                                          | %W: Polychaetes                                                                                                                 |
|                                                | Spath et al., 2013        | Uruguay and northern Argentina (34°-38°S)               | %IRI: Polychaetes, clam siphons ( <i>Amiantis purpurata</i> ) and amphipods                                                     |
|                                                | Spath, 2014               | Southwest Atlantic                                      | %IRI: Polychaetes (family Gliceridae), clam siphons ( <i>Amiantis purpurata</i> ) and amphipods                                 |
|                                                | Spath et al., 2015        | San Jorge gulf                                          | %N: Polychaetes (family Orbiniidae)                                                                                             |
| <b>Extenta</b><br><i>(Psammobatis extenta)</i> | Our study                 | Central Patagonia (41°–47°S)                            | %FO: Amphipods (Gamarids) and decapod crustaceans Dendrobranchiata ( <i>Pleoticus muelleri</i> )                                |
|                                                | Barbini, 2011             | Buenos Aires and Uruguayan coastal ecosystem (34°-41°S) | %FO: Amphipods (family Ampeliscidae) and decapod crustaceans Dendrobranchiata ( <i>Artemesia longinaris</i> )                   |
|                                                | Barbini & Lucifora, 2012  | Southwest Atlantic (34°-38°S)                           | %IRI: Amphipods ( <i>Ampelisca</i> spp.) and decapod crustaceans Dendrobranchiata ( <i>Artemesia longinaris</i> )               |
|                                                | Belleggia et al., 2019    | Northern Argentine continental shelf                    | %FO: Amphipods (Gammaridae unidentified)                                                                                        |
|                                                | Braccini & Pérez, 2005    | Quequén port (38°37'S)                                  | %IRI: Amphipods (Gammaridae) and decapod crustaceans Dendrobranchiata (Penaeoidea unidentified)                                 |
|                                                | Mabragaña, 2007           | Argentine continental shelf (34°-42°S)                  | %FO: Amphipods and decapod crustaceans Dendrobranchiata ( <i>Artemesia longinaris</i> and <i>Pleoticus muelleri</i> )           |
| <b>Normani</b><br><i>(Psammobatis normani)</i> | Our study                 | Central Patagonia (41°–47°S)                            | %FO: Decapod crustaceans Anomura ( <i>Grimothea gregaria</i> ) and Dendrobranchiata ( <i>Pleoticus muelleri</i> )               |
|                                                | Belleggia et al., 2019    | Northern Argentine continental shelf                    | %FO: Amphipods (Gammaridae) and polychaetes (Family Onuphidae)                                                                  |
|                                                | Mabragaña et al., 2005    | Southwest Atlantic (37°-50°S)                           | %FO: Crustaceans and polychaetes unidentified                                                                                   |
|                                                | Mabragaña, 2007           | Argentine shelf (34°-54°S)                              | %FO: Amphipods (Gammaridae), isopods (Serolidae), decapod crustaceans Brachyura ( <i>Peltarium spinosulum</i> ) and polychaetes |
|                                                | Mabragaña & Giberto, 2007 | Central Patagonia (41°–48°S)                            | %IA: Isopods (Serolidae), decapod crustaceans Brachyura ( <i>Peltarium spinosulum</i> ) and polychaetes                         |

|                                                       |                             |                                              |                                                                                                                                                                                                                                                  |
|-------------------------------------------------------|-----------------------------|----------------------------------------------|--------------------------------------------------------------------------------------------------------------------------------------------------------------------------------------------------------------------------------------------------|
|                                                       | Sánchez & Mabrugaña, 2002   | South Patagonian region (48°-54°30' S)       | %FO: Polychaetes and crabs unidentified                                                                                                                                                                                                          |
| <b>Rudis</b><br>( <i>Psammobatis rudis</i> )          | Our study                   | Central Patagonia (41°-47°S)                 | %FO: Decapod crustaceans Anomura ( <i>Grimothea gregaria</i> ) and Dendrobranchiata ( <i>Pleoticus muelleri</i> )                                                                                                                                |
|                                                       | Belleggia et al., 2019      | Northern Argentine continental shelf         | %FO: Polychaetes and decapod crustaceans Brachyura ( <i>Libidoclaea granaria</i> )                                                                                                                                                               |
|                                                       | Cristiniani, 2016           | Chubut and north of Santa Cruz (41°- 48°S)   | %IRI: Decapod crustaceans Dendrobranchiata ( <i>Pleoticus muelleri</i> ) and amphipods (gammarids)                                                                                                                                               |
|                                                       | Mabrugaña et al., 2005      | Southwest Atlantic                           | %FO: Crustaceans unidentified                                                                                                                                                                                                                    |
|                                                       | Mabrugaña, 2007             | Argentine shelf (34°-54°S)                   | %FO: Amphipods (gamarids) and isopods (Cirolanidae, Arcturidae and Serolidae)                                                                                                                                                                    |
|                                                       | Mabrugaña & Giberto, 2007   | Central Patagonia (41°-48°S)                 | %IA: Isopods (Arcturidae and Cirolanidae) and amphipods (gamarids)                                                                                                                                                                               |
|                                                       | Sánchez & Mabrugaña, 2002   | South Patagonian region                      | %FO: Crabs unidentified                                                                                                                                                                                                                          |
| <b>Marmolada</b><br>( <i>Sympterygia bonapartii</i> ) | Our study                   | Central Patagonia (41°-47°S)                 | %FO: Amphipods and decapod crustaceans Dendrobranchiata ( <i>Pleoticus muelleri</i> )                                                                                                                                                            |
|                                                       | Barbini, 2011               | Buenos Aires and Uruguayan coastal ecosystem | %FO: Decapod crustaceans Dendrobranchiata ( <i>Artemesia longinaris</i> ) and Brachyura ( <i>Cyrtograpsus affinis</i> , <i>Peltarion spinosulum</i> , <i>Libinia spinosa</i> , <i>Libidoclaea granaria</i> and <i>Leurocyclus tuberculosus</i> ) |
|                                                       | Barrera Oro & Maranta, 1996 | Mar del Plata                                | %FO: Decapod crustaceans Dendrobranchiata, crabs unidentified and fishes                                                                                                                                                                         |
|                                                       | Belleggia et al., 2019      | Northern Argentine continental shelf         | %FO: Decapod crustaceans Brachyura (Majidae) and Dendrobranchiata ( <i>Peltarion spinosulum</i> ) and amphipods (Gammaridae)                                                                                                                     |
|                                                       | Estalles, 2012              | San Matías gulf (41°-42°S)                   | %FO: Decapod crustaceans Brachyura ( <i>Peltarion spinosulum</i> )                                                                                                                                                                               |
|                                                       | Estalles et al., 2015       | San Matías gulf                              | %FO: Decapod crustaceans Brachyura ( <i>Peltarion spinosulum</i> ) and                                                                                                                                                                           |

|                                                        |                           |                                              |                                                                                                                                                                                                                           |
|--------------------------------------------------------|---------------------------|----------------------------------------------|---------------------------------------------------------------------------------------------------------------------------------------------------------------------------------------------------------------------------|
|                                                        |                           |                                              | Dendrobranchiata ( <i>Pleoticus muelleri</i> ) and fishes ( <i>Engraulis anchoita</i> )                                                                                                                                   |
|                                                        | Menni & Stehmann, 2000    | Argentina, Uruguay and Brazil                | Decapod crustaceans Dendrobranchiata ( <i>Artemesia longinaris</i> and <i>Pleoticus muelleri</i> ) and Brachyura ( <i>Corystoides chilensis</i> , <i>Coenophthalmus tridentatus</i> and <i>Leurocyclus tuberculatus</i> ) |
|                                                        | Milessi et al., 2019      | Río de la Plata                              | %IRI: Decapod crustaceans Dendrobranchiata ( <i>Artemesia longinaris</i> ) and cumaceans                                                                                                                                  |
|                                                        | Paesch, 2000              | Argentine-Uruguayan Common Fishing Zone      | Decapod crustaceans Brachyura ( <i>Libidoclaea granaria</i> and <i>Peltarion spinosulum</i> ) and fishes ( <i>Raneya fluminensis</i> and <i>Merluccius hubbsi</i> )                                                       |
|                                                        | Sánchez & Prenski, 1996   | San Jorge gulf                               | %W: Stomatopods and Decapod crustaceans Anomura (Munida)                                                                                                                                                                  |
|                                                        | Sánchez & Mabrugaña, 2002 | South Patagonian region                      | %FO: Crabs unidentified                                                                                                                                                                                                   |
| <b>Acuta</b><br>( <i>Sympterygia acuta</i> )           | Our study                 | Central Patagonia (41°–47°S)                 | %FO: Decapod crustaceans Dendrobranchiata ( <i>Pleoticus muelleri</i> ) and amphipods                                                                                                                                     |
|                                                        | Barbini, 2011             | Buenos Aires and Uruguayan coastal ecosystem | %FO: Fishes ( <i>Dules auriga</i> and <i>Engraulis anchoita</i> ), decapod crustaceans Dendrobranchiata ( <i>Artemesia longinaris</i> ) and Brachyura ( <i>Libinia spinosa</i> and <i>Cyrtograpsus affinis</i> )          |
|                                                        | Barbini & Lucifora, 2016  | Southwest Atlantic (33°–40°S)                | %FO: Fishes ( <i>Dules auriga</i> and <i>Engraulis anchoita</i> ), decapod crustaceans Dendrobranchiata ( <i>Artemesia longinaris</i> ) and Brachyura ( <i>Cyrtograpsus affinis</i> )                                     |
|                                                        | Belleggia et al., 2019    | Northern Argentine continental shelf         | %FO: Decapod crustaceans Brachyura (Pinnotheridae) and Dendrobranchiata ( <i>Pleoticus muelleri</i> and <i>Mysis</i> spp.), amphipods (Gammaridae) and fishes ( <i>Raneya brasiliensis</i> and <i>Paralichthys</i> spp.)  |
|                                                        | Menni & Stehmann, 2000    | Argentina, Uruguay and Brazil                | Decapod crustaceans Dendrobranchiata ( <i>Artemesia longinars</i> )                                                                                                                                                       |
| <b>Raya hoccuda</b><br>( <i>Zearaja brevicaudata</i> ) | Our study                 | Central Patagonia (41°–47°S)                 | %FO: Decapod crustaceans Anomura ( <i>Grimothea gregaria</i> ) and Dendrobranchiata ( <i>Pleoticus muelleri</i> ) and fish ( <i>Merluccius hubbsi</i> )                                                                   |

|                                                    |                           |                                           |                                                                                                                                                                                                                         |
|----------------------------------------------------|---------------------------|-------------------------------------------|-------------------------------------------------------------------------------------------------------------------------------------------------------------------------------------------------------------------------|
|                                                    | Belleggia et al., 2016    | Southwest Atlantic (35°-54°S)             | %IRI: Fishes ( <i>Patagonotothen ramsayi</i> and <i>Merluccius hubbsi</i> )                                                                                                                                             |
|                                                    | Belleggia et al., 2019    | Northern Argentine continental shelf      | %FO: Fish ( <i>Raneya brasiliensis</i> )                                                                                                                                                                                |
|                                                    | Buren, 2004               | Northern and central Patagonia (41°-47°S) | %FO: 1996-1998: cephalopods ( <i>Illex argentinus</i> ) and fishes ( <i>Patagonotothen ramsayi</i> and <i>Merluccius hubbsi</i> )/ 2000-2001: fish ( <i>Merluccius hubbsi</i> ) and isopods ( <i>Serolis schythei</i> ) |
|                                                    | García de la Rosa, 1998   | Argentine continental shelf (34°-56° S)   | %FO: Decapod crustaceans Anomura (Munids) and fish ( <i>Merluccius hubbsi</i> )                                                                                                                                         |
|                                                    | Koen Alonso, 1999         | Northern and central Patagonia (41°-47°S) | %FO: Fishes ( <i>Merluccius hubbsi</i> , <i>Patagonotothen ramsayi</i> , <i>Raneya brasiliensis</i> and <i>Engraulis anchoita</i> ), cephalopods ( <i>Illex argentinus</i> ) and isopods ( <i>Serolis schythei</i> )    |
|                                                    | Koen Alonso et al., 2001  | Northern and central Patagonia (41°-47°S) | %FO: Fishes ( <i>Merluccius hubbsi</i> , <i>Patagonotothen ramsayi</i> , <i>Raneya brasiliensis</i> and <i>Engraulis anchoita</i> ), cephalopods ( <i>Illex argentinus</i> ) and isopods ( <i>Serolis schythei</i> )    |
|                                                    | Lucifora et al., 2000     | Southwest Atlantic (41°36'-42°04'S)       | IRI: Fishes ( <i>Patagonotothen ramsayi</i> and <i>Merluccius hubbsi</i> ), cephalopods ( <i>Illex argentinus</i> ) and isopods ( <i>Serolis schythei</i> )                                                             |
|                                                    | Mabragaña et al., 2005    | Southwest Atlantic (37°-50°S)             | %FO: Crustaceans, fishes and molluscs unidentified                                                                                                                                                                      |
|                                                    | Olivier et al., 1968      | Mar del Plata                             | %FO: Decapod crustaceans Dendrobranchiata ( <i>Artemesia longinaris</i> and <i>Peisos petrunkevitchi</i> ) and Brachyura ( <i>Corystoides chilensis</i> )                                                               |
|                                                    | Sánchez & Prenski, 1996   | San Jorge gulf                            | %W: Stomatopods, decapod crustaceans Anomura ( <i>Munida sp.</i> ) and fish ( <i>Merluccius hubbsi</i> )                                                                                                                |
|                                                    | Sánchez & Mabragaña, 2002 | South Patagonian region (48°-55°S)        | %FO: Fishes, crustaceans and molluscs                                                                                                                                                                                   |
| <b>Chucho</b><br><b>(<i>Myliobatis goodii</i>)</b> | Our study                 | Central Patagonia (41°-47°S)              | %FO: Polychaetes (Family Gliceridae) and decapod crustaceans Dendrobranchiata ( <i>Pleoticus muelleri</i> )                                                                                                             |
|                                                    | Molina, 2012              | Bahía Anegada (39.96°-40.60°S)            | %FO: Bivalves ( <i>Lasaea</i> and <i>Solen techuelchus</i> ), amphipods (Caprellidae) and polychaetes (Phyllodocidae)                                                                                                   |
|                                                    | Molina & Cazorla, 2015    | Bahía Anegada                             | %FO: Bivalves ( <i>Lasaea sp.</i> ), polychaetes (Phyllodocidae) and amphipods (Caprellidae)                                                                                                                            |

|  |                         |                                              |                                                                                                           |
|--|-------------------------|----------------------------------------------|-----------------------------------------------------------------------------------------------------------|
|  |                         |                                              |                                                                                                           |
|  | Refi, 1975              | Quequén port (38°37'S)                       | Crabs, stomatopods, polychaetes, amphipods and ascidians unidentified                                     |
|  | Ruocco, 2012            | Buenos Aires and Uruguayan coastal ecosystem | Polychaetes, decapod crustaceans and amphipods (gamarids)                                                 |
|  | Ruocco & Lucifora, 2016 | Southwest Atlantic (34°-42°S)                | %FO: Polychaetes ( <i>Travisia</i> spp.) and decapod crustaceans <i>Anomura</i> ( <i>Sympagurus</i> spp.) |

## References

- Arrighetti, F., J. pablo Livore & P. Penchaszadeh, 2005. Siphon nipping of the bivalve *Amiantis purpurata* by the electric ray *Discopyge tschudii* in Mar del Plata, Argentina. Marine Biological Association of the United Kingdom. Journal of the Marine Biological Association of the United Kingdom 85(5): 1151. <https://doi.org/10.1017/S0025315405012221>
- Barbini S.A. & L.O. Lucifora, 2012. Ontogenetic diet shifts and food partitioning between two small sympatric skates (Chondrichthyes, Rajidae) in the Southwestern Atlantic. Marine and Freshwater Research 63(10): 905-913.
- Barbini S.A. & L.O. Lucifora L.O, 2016b. Big fish (and a smallish skate) eat small fish: diet variation and trophic level of *Sympterygia acuta*, a medium-sized skate high in the food web. Marine Ecology 37: 283–293.
- Barrera Oro, E. & A. Maranta, 1996. Régimen alimentario estacional de *Sympterygia bonapartii*, Muller y Henle 1841 (Rajidae), en Mar del Plata. Boletim do Laboratorio de Hidrobiología 9:33–53.
- Belleggia, M., D.E. Figueroa, F. Sánchez & C. Bremec, 2012. Long-term changes in the spiny dogfish (*Squalus acanthias*) trophic role in the southwestern Atlantic. Hydrobiologia 684: 57-67.
- Braccini, J.M. & J.E. Perez, 2005. Feeding habits of the sand skate *Psammobatis extenta* (Garman, 1913): sources of variation in dietary composition. Marine and Freshwater Research 56(4): 395-403.
- Buren A.D., 2004. Dieta de la raya picuda, *Dipturus chilensis*, en aguas del norte y centro de Patagonia durante el período 2000-2001. Tesis de licenciatura. Universidad Nacional de la Patagonia San Juan Bosco, Comodoro Rivadavia, 70 pp.
- Chiaromonte, G.E. & A.D. Pettovello, 2000. The biology of *Mustelus schmitti* in Southern Patagonia, Argentina. Journal of Fish Biology 57(4): 930–942.
- Elías I., A. Rodríguez, E. Hasan, M.V. Reyna & R.O. Amoroso, 2004. Biological observations of the tope shark, *Galeorhinus galeus*, in the northern Patagonian gulfs of Argentina. Journal of Northwest Atlantic Fishery Science.
- Estalles, M.L., M.R. Perier & E.E. Di Giacomio, 2015. Trophic ecology of the smallnose fanskate *Sympterygia bonapartii* in the San Matías Gulf, northern Patagonia, Argentina. Ichthyological research 63(2): 207-217.
- García, M.L, 1984. Sobre la biología de *Discopyge tschudii* (Chondrichthyes, narcinidae). Physis 42(103).
- García de La Rosa, S.B. & M.F. Sánchez, 1997. Alimentación de *Squalus acanthias* y predación sobre *Merluccius hubbsi* en el Mar Argentino entre 34° 47'-47° S. Revista de Investigación y Desarrollo Pesquero, Mar del Plata.
- García de La Rosa, S.B., 1998. Estudio de la interrelaciones tróficas de dos elasmobranquios del Mar Argentino, en relación con las variaciones espacio-temporales y ambientales. *Squalus acanthias* (Squalidae) y *Raja flavirostris* (= *Dipturus chilensis*) (Rajidae). Tesis en Ciencias Marinas, 215 pp.
- Koen Alonso, M., 1999. Estudio comparado de la alimentación entre algunos predadores de alto nivel trófico de la comunidad marina del norte y centro de Patagonia. Tesis doctoral, Universidad Nacional de Buenos Aires, 182 pp.
- Koen Alonso, M., E.A. Crespo, N.A. García, S.N. Pedraza, P.A. Mariotti, B.B. Vera & N.J. Mora, 2001. Food habits of *Dipturus chilensis* (Pisces: Rajidae) off Patagonia, Argentina. ICES Journal of Marine Science 58(1): 288-297.

- Lucifora L.O., J.L. Valero, C.S. Bremec & M.L. Lasta, 2000. Feeding habits and prey selection by the skate *Dipturus chilensis* (Elasmobranchii: Rajidae) from the south-western Atlantic. *Journal of the Marine Biological Association of the UK* 80(5): 953-954.
- Lucifora L.O., 2003. Ecología y conservación de los grandes tiburones costeros de Bahía Anegada. Provincia de Buenos Aires, Argentina. Tesis doctoral, Universidad Nacional de Mar del Plata, 410 pp.
- Lucifora L.O., V.B. García, R.C. Menni & A.H. Escalante, 2006. Food habits, selectivity, and foraging modes of the school shark *Galeorhinus galeus*. *Marine Ecology Progress Series* 315: 259-270.
- Mabragaña E., D.A. Giberto & C.S. Bremec, 2005. Feeding ecology of *Bathyraja macloviana* (Rajiformes, Arhynchobatidae): a polychaete-feeding skate from the South-west Atlantic. *Scientia Marina* 69(3): 405-413.
- Mabragaña, E., 2007. Las rayas del género *Psammodotis* de la Plataforma Argentina: Biología y Ecología. Tesis doctoral, Universidad Nacional de Mar del Plata. Facultad de Ciencias Exactas y Naturales, 178 pp.
- Matallanas J., M. Carrasson & M. Casadevall, 1993. Observations on the feeding habits of the narrow-mouthed catshark *Schroederichthys bivius* (Chondrichthyes, Scyliorhinidae) in the Beagle Channel. *Cybiurn* 17(1): 55-61.
- Menni R.C., A.E. Gosztanyi & H. Lopez, 1979. Sobre la ecología y biología de *Halaelurus bivius* (Chondrichthyes, Scyliorhinidae). *Revista del Museo Argentino de Ciencias Naturales, Ecología* 2(3): 71-88.
- Menni, R. C., M.B. Cousseau & A.R. Gosztanyi, 1986. Sobre la biología de los tiburones costeros de la provincia de Buenos Aires. *Anales de la Sociedad Científica Argentina* 213: 3-26. }
- Menni, R.C. & M.F.W. Stehmann, 2000. Distribution, environment and biology of batoid fishes off Argentina, Uruguay and Brazil, a review. *Revista del Museo Argentino de Ciencias Naturales* 2(1): 69-109.
- Milessi, A. C., A.M. De Wysiecki & A.J. Jaureguizar, 2019. Trophic ecology of young-of-the-year elasmobranchs in a critical habitat within the Río de la Plata outer estuarine waters. *Austral Ecology* 44(2): 290-299.
- Molina, J. M., 2012. La comunidad íctica de Bahía Anegada: estructura, composición, dinámica estacional y aspectos biológicos. Tesis Doctoral en Biología, Universidad Nacional del Sur, 234 pp.
- Molina J.M. & A.L. Cazorla, 2015. Biology of *Myliobatis goodei* (Springer, 1939), a widely distributed eagle ray, caught in northern Patagonia. *Journal of Sea Research* 95: 106-114.
- Olivier, S. R., R.O. Bastida & M.R. Torti, 1968. Sobre el ecosistema de las aguas litorales de Mar del Plata. Niveles tróficos y cadenas alimentarias pelágicos demersales y bentónicos-demersales.
- Paesch L., 2000. Hábitos alimentarios de algunas especies de elasmobranquios en el frente oceánico del Río de La Plata. *Frente Marítimo* 18(A): 71–90.
- Refi S.M. 1975. Myliobatidae y Dasyatidae del litoral bonaerense de la República Argentina y estudio comparado del mixopterigio (Chondrichthyes, Myliobatoidea). *Physis*, 34(88).
- Ruocco N.L., 2012. Ecología y conservación de los chuchos (Chondrichthyes, Myliobatiformes) del ecosistema costero bonaerense y uruguayo. Tesis doctoral, Universidad Nacional de Mar del Plata. Facultad de Ciencias Exactas y Naturales, 273 pp.
- Ruocco N.L. & L.O. Lucifora, 2016. Ecological singularity of temperate mesopredatory myliobatid rays (Chondrichthyes: Myliobatiformes). *Marine & Freshwater Research*.
- Sánchez M.F. & E. Mabragaña, 2002. Características biológicas de algunas rayas de la región Sudpatagónica. INIDEP Informe Técnico 48.
- Spath, M., S. Barbini & D. Figueroa, 2013. Feeding habits of the apron ray, *Discopyge tschudii* (Elasmobranchii: Narcinidae), from off Uruguay and northern Argentina. *Journal of the Marine Biological Association of the United Kingdom* 93(2): 291-297. doi:10.1017/S0025315412000665
- Spath C., 2014. Ecología reproductiva y hábitos alimentarios del torpedo chico *Discopyge tschudii* (Chondrichthyes, Narcinidae) en el Atlántico Sudoccidental. Tesis Doctoral Universidad Nacional de Mar del Plata, 190 pp.
- Vögler, R., A.C. Milessi & R.A. Quiñones, 2003. Trophic ecology of *Squatina guggenheim* on the continental shelf off Uruguay and northern Argentina. *Journal of Fish Biology* 62(6): 1254-1267.
- Vögler, R., A.C. Milessi & L.O. Duarte, 2009. Changes in trophic level of *Squatina guggenheim* with increasing body length: relationships with type, size and trophic level of its prey. *Environmental Biology of Fishes* 84: 41-52.

**ESM 3** Trophic diversity accumulation curves: cumulative numbers of randomly pooled stomachs against cumulative diversity for all stomachs sampled for the 13 elasmobranch species included in this study. Horizontal lines show Brillouin diversity index (Hz) values ( $Hz \pm 0.05 Hz$ ), and the vertical line shows value  $n-2$  ( $n$  = the number of stomachs). Diversity curves were considered asymptotic if at least the last two previous values were within  $\pm 0.05$  of the total sample trophic diversity

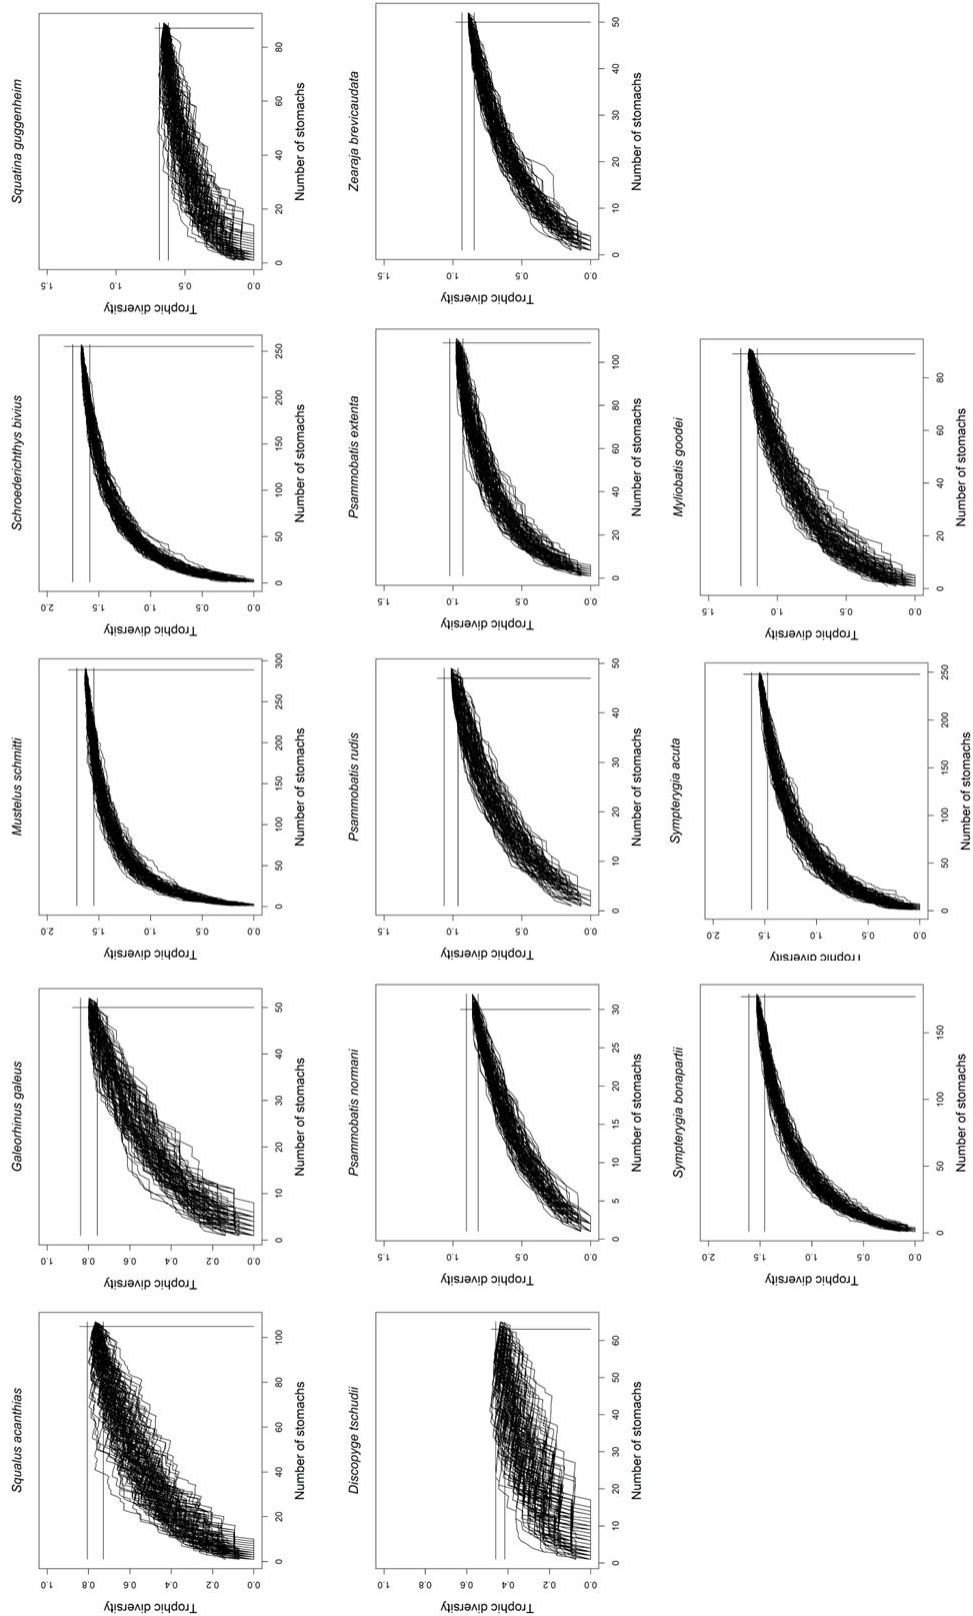

**ESM 4** Ordination plot obtained by NMDS for capture sites (Stress= 0.0624). Ellipses denote the 95% of interval of confidence for each group evaluated

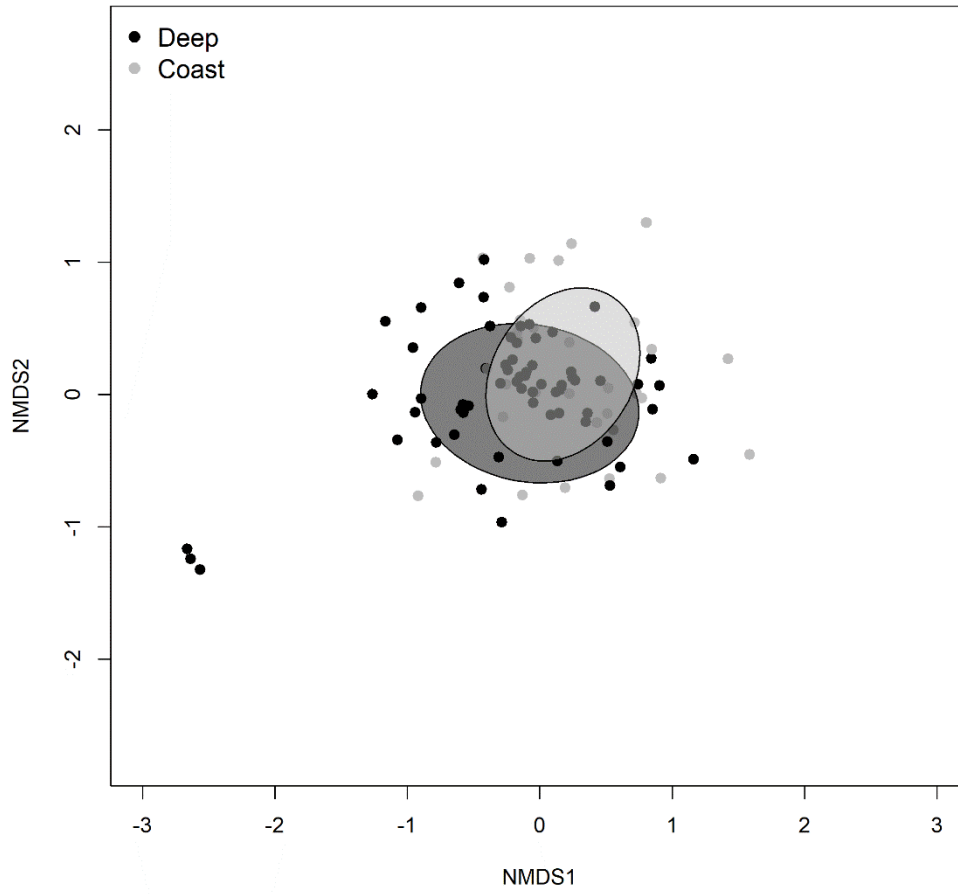

Supplement: Supplementary file 1 [file 247161c1c52ae5358f3806f2.pdf]
